# Supplementary material for: Assessment of Adherence to the Core Elements of Hospital Antibiotic Stewardship Programs: A Survey of the Tertiary Care Hospitals in Punjab, Pakistan
Source: MDPI journal article supplement (doi:10.3390/antibiotics10080906), 2021-07-24
Supplement: s1 [file s1]

## **Supplementary Materials**

**Table S1. Survey Instrument CDC assessment tool for core elements of hospital antibiotic stewardship programs**

**Table S2. Individual hospital response SPSS file**

**Table S1. Survey Instrument CDC assessment tool for core elements of hospital antibiotic stewardship programs**

| CORE ELEMENTS OF HOSPITAL ANTIBIOTIC STEWARDSHIP PROGRAMS: ASSESSMENT TOOL |                                                                                                                                                                                                                                  | ESTABLISHED AT FACILITY |
|----------------------------------------------------------------------------|----------------------------------------------------------------------------------------------------------------------------------------------------------------------------------------------------------------------------------|-------------------------|
| <b>Hospital Leadership Commitment</b>                                      | 1. [Priority Example] Does facility leadership provide stewardship program leader(s) dedicated time to manage the program and conduct daily stewardship interventions?                                                           | Yes/No/Under Process    |
|                                                                            | 2. [Priority Example] Does facility leadership provide stewardship program leader(s) with resources (e.g. IT support, training) to effectively operate the program?                                                              | Yes/No/Under Process    |
|                                                                            | 3. [Priority Example] Does your antibiotic stewardship program have a senior executive that serves as a point of contact or “champion” to help ensure the program has resources and support to accomplish its mission?           | Yes/No/Under Process    |
|                                                                            | 4. [Priority Example] Do stewardship program leader(s) have regularly scheduled meetings with facility leadership and/or the hospital board to report and discuss stewardship activities, resources and outcomes?                | Yes/No/Under Process    |
| <b>Accountability</b>                                                      | 1. Does your facility have a leader or co-leaders responsible for program management and outcomes of stewardship activities?                                                                                                     | Yes/No/Under Process    |
| <b>Pharmacy Expertise</b>                                                  | 1. Does your facility have a pharmacist(s) responsible for leading implementation efforts to improve antibiotic use?                                                                                                             | Yes/No/Under Process    |
|                                                                            | 2. Does your pharmacist(s) leading implementation efforts have specific training and/or experience in antibiotic stewardship?                                                                                                    | Yes/No/Under Process    |
| <b>Action: Implement Interventions to Improve Antibiotic Use</b>           | 1. [Priority Example] Does your facility perform prospective audit and feedback for specific antibiotic agents?                                                                                                                  | Yes/No/Under Process    |
|                                                                            | 2. [Priority Example] Does your facility perform preauthorization for specific antibiotic agents?                                                                                                                                | Yes/No/Under Process    |
|                                                                            | 3. [Priority Example] Does your facility have facility-specific treatment recommendations, based on national guidelines and local pathogen susceptibilities, to assist with antibiotic selection for common clinical conditions? | Yes/No/Under Process    |

|                                              |                                                                                                                                                                                               |                      |
|----------------------------------------------|-----------------------------------------------------------------------------------------------------------------------------------------------------------------------------------------------|----------------------|
| <b>Tracking Antibiotic Use and Outcomes</b>  | 1. [Priority Example] Does your antibiotic stewardship program track antibiotic use by submitting to the national/provisional/international center Antimicrobial Use (AU) Option?             | Yes/No/Under Process |
|                                              | 2. [Priority Example] Does your antibiotic stewardship program monitor prospective audit and feedback interventions by tracking the types of interventions and acceptance of recommendations? | Yes/No/Under Process |
|                                              | 3. [Priority Example] Does your antibiotic stewardship program monitor preauthorization interventions by tracking which agents are being requested for which conditions?                      | Yes/No/Under Process |
|                                              | 4. [Priority Example] Does your stewardship program monitor adherence to facility- specific treatment recommendations?                                                                        | Yes/No/Under Process |
| <b>Reporting Antibiotic Use and Outcomes</b> | 1. Does your antibiotic stewardship program share facility and/or individual prescriber-specific reports on antibiotic use with prescribers?                                                  | Yes/No/Under Process |
|                                              | 2. Does your antibiotic stewardship program report adherence to treatment recommendations to prescribers (e.g., results from medication use evaluations, etc)?                                | Yes/No/Under Process |
|                                              | 3. Has your facility distributed a current antibiogram to prescribers?                                                                                                                        | Yes/No/Under Process |
| <b>Education</b>                             | 1. Does your stewardship program provide education to prescribers and other relevant staff on optimal prescribing, adverse reactions from antibiotics, and antibiotic resistance?             | Yes/No/Under Process |
|                                              | 2. Does your stewardship program provide education to prescribers as part of the prospective audit and feedback process (sometimes called “handshake stewardship”)?                           | Yes/No/Under Process |

Table S2 Individual hospital response SPSS file

|     | Hospital_division | Leadership_com | Leadership_com | Leadership_com | Leadership_com | Accountability | Pharmacy_expe | Pharmacy_expe | Action_1      | Action_2      | Action_3      | Tracking_1    | Tracking_2    | Tracking_3    | Tracking_4    | Reporting_1   | Reporting_2   | Reporting_3   | Education_1   | Education_2   |
|-----|-------------------|----------------|----------------|----------------|----------------|----------------|---------------|---------------|---------------|---------------|---------------|---------------|---------------|---------------|---------------|---------------|---------------|---------------|---------------|---------------|
| H1  | Public            | Yes            | No             | Yes            | Yes            | Yes            | Yes           | Yes           | No            | Under process | Under process | Under process | No            | Under process | Under process | No            | Under process | No            | Yes           | Yes           |
| H2  | Private           | Yes            | No             | Yes            | Yes            | Under process  | Yes           | Yes           | Under process | Under process | Under process | No            | Under process | Under process | Under process | No            | No            | No            | Yes           | Under process |
| H3  | Public            | No             | No             | No             | No             | No             | Yes           | Under process | No            | No            | No            | No            | No            | No            | Under process | No            | No            | No            | Yes           | Yes           |
| H4  | Public            | Under process  | Under process  | Under process  | No             | Yes            | Yes           | Under process | No            | No            | No            | Under process | No            | No            | No            | No            | No            | No            | Yes           | Under process |
| H5  | Public            | No             | No             | No             | No             | No             | No            | Yes           | No            | No            | No            | Under process | No            |
| H6  | Public            | Yes            | No             | Yes            | No             | Yes            | Yes           | No            | Yes           | No            | Under process | No            | Under process | No            | Under process | No            | No            | No            | Yes           | Yes           |
| H7  | Private           | No             | No             | Under process  | No             | No             | Yes           | Under process | Under process | No            | No            | No            | Yes           | Under process |
| H8  | Private           | Yes            | No             | Yes            | Yes            | Yes            | Under process | No            | Under process | No            | No            | No            | Yes           | No            |
| H9  | Public            | Yes            | No             | Yes            | Yes            | No             | Yes           | Under process | No            | Public        | Under process | No            | No            | No            | Under process | No            | No            | No            | No            | No            |
| H10 | Public            | Yes            | Under process  | Yes            | Yes            | Yes            | Yes           | Yes           | Under process | Under process | Under process | No            | Yes           | Under process | Under process | No            | No            | Yes           | Yes           | Yes           |
| H11 | Public            | No             | No             | No             | No             | Yes            | Yes           | Under process | Yes           | No            | Under process | No            | Yes           | No            | Under process | No            | No            | No            | Yes           | Yes           |
| H12 | Public            | Yes            | No             | Yes            | Yes            | Yes            | Yes           | Yes           | No            | No            | Under process | Under process | No            | No            | Under process | No            | No            | No            | Yes           | Yes           |
| H13 | Public            | No             | No             | No             | No             | No             | Yes           | Under process | No            | No            | Under process | Under process | No            | No            | Under process | No            | No            | No            | Yes           | Under process |
| H14 | Public            | Under process  | No             | Under process  | No             | Yes            | Yes           | Under process | Under process | Yes           | No            | Under process | No            | Yes           | Under process | No            | Under process | No            | Yes           | Yes           |
| H15 | Private           | No             | No             | Under process  | No             | Yes            | No            | No            | Yes           | Under process | Under process | No            |
| H16 | Public            | Under process  | No             | Under process  | No             | No             | No            | Under process | No            | No            | Under process | No            | No            | No            | No            | No            |
| H17 | Private           | Under process  | Under process  | No             | No             | Under process  | Yes           | No            |
| H18 | Private           | Yes            | Under process  | Yes            | Yes            | Yes            | Yes           | Yes           | No            | Under process | Under process | No            | No            | Under process | Under process | No            | Under process | No            | Yes           | Under process |
| H19 | Public            | Yes            | No             | Yes            | No             | Yes            | Yes           | Under process | No            | Under process | Under process | No            | No            | Under process | No            | No            | No            | No            | Yes           | Yes           |
| H20 | Public            | Yes            | No             | Yes            | Under process  | Yes            | Under process | Under process | Yes           | No            | No            | No            | Under process | No            | No            | No            | No            | No            | Yes           | Under process |
| H21 | Private           | No             | No             | Under process  | No             | Under process  | Yes           | Under process | Yes           | Under process | Under process | Under process | Under process | No            | No            | No            | No            | Under process | Under process | No            |
| H22 | Public            | No             | No             | No             | No             | Yes            | Under process | No            | Yes           | No            | Yes           | Under process |
| H23 | Private           | Yes            | No             | Yes            | Yes            | Yes            | Yes           | Yes           | Yes           | No            | Under process | Under process | Yes           | No            | Under process | No            | Under process | Under process | Yes           | Yes           |
| H24 | Private           | No             | No             | Under process  | No             | Yes            | No            | No            | Yes           | Under process | Under process | No            | No            | No            | No            | No            | Under process | Under process | Yes           | Yes           |
| H25 | Public            | No             | No             | Under process  | No             | Under process  | Yes           | Under process | Yes           | Under process | No            | No            | Under process | Under process | No            | No            | No            | No            | No            | No            |
| H26 | Public            | No             | No             | No             | No             | Yes            | Yes           | Yes           | Under process | Under process | Under process | No            | Under process | Under process |
| H27 | Public            | Under process  | Under process  | Under process  | No             | Yes            | No            | No            | Under process | No            | No            | No            | No            | No            | Yes           | Yes           |
| H28 | Public            | No             | No             | Under process  | No             | Under process  | Yes           | No            | Yes           | Under process | Under process | No            | Under process | No            | No            | No            | No            | No            | No            | Under process |
| H29 | Private           | Yes            | No             | Yes            | No             | Yes            | Yes           | Under process | Yes           | Under process | Under process | No            | Yes           | Under process |
| H30 | Private           | Yes            | No             | No             | No             | Yes            | No            | Under process | Under process |
| H31 | Private           | Yes            | Under process  | Yes            | Under process  | Yes            | Under process | Under process | Yes           | Under process | Under process | No            | Yes           | Under process | Yes           | Yes           |
| H32 | Public            | No             | No             | No             | No             | No             | Under process | No            | Under process | No            | Under process | No            | Under process | No            | Under process | No            | No            | No            | Under process | Under process |
| H33 | Public            | Yes            | No             | Yes            | No             | Yes            | Yes           | Under process | No            | Under process | Under process | No            | No            | Under process | Under process | No            | Under process | Under process | Under process | Under process |
| H34 | Public            | Yes            | Yes            | Yes            | Yes            | Yes            | Yes           | Yes           | Yes           | No            | Under process | Under process | Yes           | No            | Under process | No            | Under process | No            | Yes           | Yes           |
| H35 | Public            | Yes            | Under process  | Yes            | No             | Yes            | Yes           | Yes           | Yes           | Under process | Under process | Under process | Under process | No            | No            | No            | Under process | Under process | Yes           | Yes           |
| H36 | Public            | Yes            | Under process  | Yes            | Yes            | Yes            | Yes           | Yes           | Yes           | Yes           | Under process | No            | Yes           | Under process | Under process | No            | Under process | Under process | Yes           | Yes           |
| H37 | Public            | Yes            | No             | Yes            | No             | Under process  | No            | Under process | Under process | No            | No            | No            | No            | No            |
| H38 | Private           | Yes            | Under process  | Yes            | Yes            | Yes            | Yes           | Yes           | Yes           | Under process | Under process | No            | Under process | Under process | Under process | No            | No            | No            | Yes           | Yes           |
| H39 | Private           | Yes            | Yes            | Yes            | Yes            | Yes            | Yes           | Yes           | Yes           | Yes           | Yes           | No            | Yes           | Yes           | Yes           | No            | Under process | Under process | Yes           | Yes           |
| H40 | Private           | No             | No             | Under process  | No             | Yes            | Yes           | Under process | No            | No            | No            | Under process | Under process | Under process | No            | Under process |
| H41 | Public            | No             | No             | Under process  | No             | Yes            | Under process | No            | Under process | Under process | No            | Under process | Under process | No            | No            | No            | No            | No            | Under process | Under process |
| H42 | Public            | No             | No             | No             | No             | Under process  | No            | No            | No            | No            | No            | Under process | No            | No            | No            | No            | No            | No            | Yes           | Under process |
| H43 | Private           | Yes            | Under process  | Yes            | Yes            | Yes            | Yes           | Yes           | Yes           | Under process | No            | Under process | Under process | Yes           | Yes           |
| H44 | Private           | No             | No             | No             | No             | No             | Yes           | Under process | Yes           | Under process | Under process | No            | Under process | Under process | Under process | No            | No            | No            | No            | No            |
| H45 | Private           | No             | No             | Under process  | No             | Yes            | No            | No            | Yes           | No            | No            | No            | Yes           | No            | No            | No            | No            | No            | Yes           | Yes           |
| H46 | Public            | Yes            | Under process  | Yes            | Yes            | Yes            | No            | No            | Yes           | Under process | Under process | No            | Under process | Under process | Under process | No            | Under process | No            | Yes           | Yes           |
| H47 | Private           | Yes            | Under process  | Yes            | Yes            | Yes            | Yes           | Yes           | No            | Under process | Under process | No            | No            | Under process | Under process | No            | No            | No            | Yes           | Under process |
| H48 | Private           | No             | No             | No             | No             | Yes            | No            | Yes           | Under process |
| H49 | Private           | Yes            | Under process  | Yes            | No             | Under process  | Under process | No            | Yes           | Under process |
| H50 | Private           | No             | No             | Under process  | No             | No             | No            | Under process | No            | Under process | Under process | No            | No            | Under process | Under process | No            | No            | No            | Under process | Under process |
| H51 | Public            | No             | No             | No             | No             | No             | No            | No            | No            | No            | No            | No            | No            | No            | No            | No            | No            | No            | No            | No            |
| H52 | Private           | No             | No             | Under process  | No             | Under process  | No            | No            | No            | No            | Under process | Under process | No            | No            | Under process | No            | No            | No            | Yes           | Under process |
| H53 | Private           | Under process  | No             | Under process  | No             | Under process  | No            | No            | No            | No            | Under process | Under process | No            | No            | Under process | No            | No            | No            | Yes           | Under process |
| H54 | Public            | Yes            | No             | Yes            | Under process  | Yes            | Yes           | Yes           | Yes           | Under process | Under process | Under process | Yes           | Under process | Under process | No            | Under process | Under process | Yes           | Yes           |
| H55 | Private           | No             | No             | No             | No             | Under process  | Yes           | Under process | No            | Under process | Under process | No            | No            | Under process | Under process | No            | Under process | No            | Under process | Under process |
| H56 | Public            | No             | No             | No             | No             | Yes            | No            |
| H57 | Private           | No             | No             | Under process  | No             | No             | Under process | No            | Under process | Under process | No            | No            | Under process | Under process | Under process | No            | No            | No            | Under process | No            |
| H58 | Private           | Yes            | No             | Yes            | Yes            | Yes            | Yes           | Under process | No            | Under process | Under process | No            | No            | Under process | Under process | No            | Under process | No            | Yes           | Yes           |
| H59 | Private           | No             | No             | No             | No             | No             | No            | No            | No            | No            | No            | No            | No            | No            | No            | No            | No            | No            | No            | No            |
| H60 | Private           | Yes            | Under process  | Yes            | Yes            | Under process  | Yes           | Yes           | Under process | Under process | Under process | No            | Under process | Under process | Under process | No            | Under process | No            | Yes           | Under process |
| H61 | Private           | Yes            | No             | Yes            | No             | Yes            | No            | No            | Yes           | No            | No            | No            | Under process | No            | No            | No            | No            | Yes           | Yes           | Yes           |
| H62 | Private           | No             | No             | No             | No             | Under process  | Yes           | Under process | No            | Under process | Under process | Yes           | Under process |
| H63 | Private           | No             | No             | No             | No             | Under process  | Yes           | Under process | No            | Under process | Under process | Yes           | Under process |
| H64 | Private           | No             | No             | Under process  | No             | No             | Yes           | No            | Under process | Under process | Yes           | Under process |
| H65 | Private           | Yes            | Yes            | Yes            | Yes            | Under process  | Under process | No            | Under process | No            | Under process | No            | No            | Under process | Under process | No            | No            | No            | Yes           | Under process |
| H66 | Private           | No             | No             | No             | No             | Under process  | Yes           | Under process | Under process | Under process | Under process | No            | Under process | Under process | Under process | No            | No            | No            | Yes           | Yes           |
| H67 | Public            | Yes            | Under process  | Yes            | Yes            | No             | Under process | No            | Yes           | Under process |
| H68 | Public            | No             | No             | No             | No             | No             | No            | No            | No            | No            | No            | No            | No            | No            | No            | No            | No            | No            | No            | No            |
